# Supplementary material for: miR-125b differentially impacts mineralization in dexamethasone and calcium-treated human mesenchymal stem cells
Source: PubMed Central journal article supplement (PMC11787018; doi:10.1016/j.omtn.2024.102446), 2025-01-03
Supplement: mmc1.pdf [file mmc1.pdf]

**OMTN, Volume 36**

**Supplemental information**

**miR-125b differentially impacts mineralization  
in dexamethasone and calcium-treated  
human mesenchymal stem cells**

**Virginie Joris, Elizabeth R. Balmayor, and Martijn van Griensven**

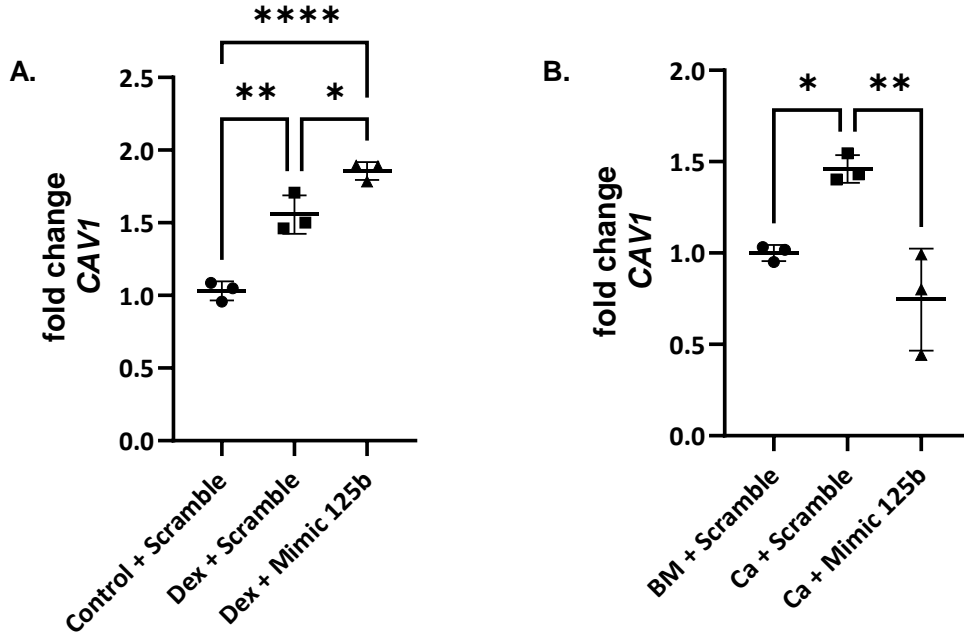

Figure S1: **Caveolin-1 is differentially regulated in dexamethasone and calcium-treated cells transfected with miR-125b.** hMSCs were transfected with scramble or mimic and cultured in control, dexamethasone (A) or calcium (B) medium. CAV1 expression was measured using qPCR. \* $p < 0.05$ ; \*\* $p < 0.01$ ; \*\*\*\* $p < 0.0001$  based on fold change relative to control + scramble.

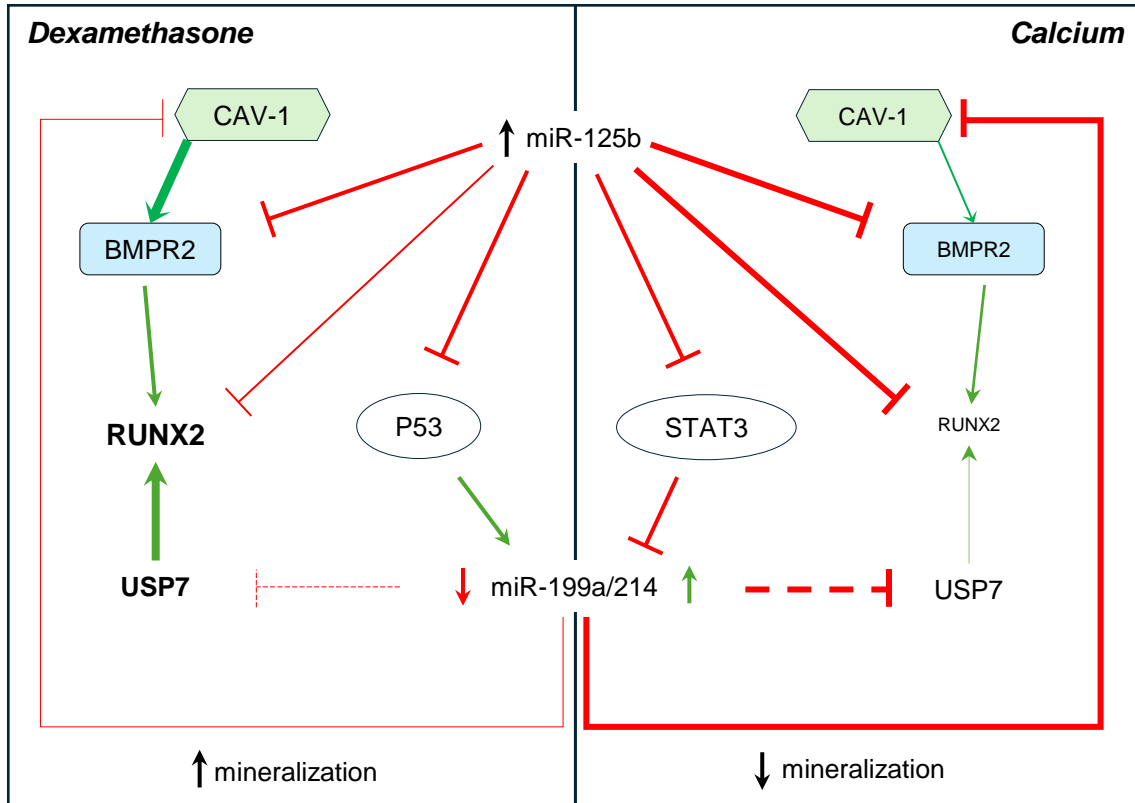

Figure S2: **Overexpression of miR-125b induces opposite effect of mineralization in dexamethasone- and calcium-treated cells.** The left panel shows that overexpression of miR-125b in dexamethasone-treated cells decreases p53 leading to lower expression of miR-199a/214 cluster. This relieves the inhibition of USP7 and BMPR2 (via CAV-1) leading to higher level of RUNX2 translated by higher mineralization. At the opposite, the right panels shows that the overexpression of miR-125b in calcium-treated cells reduces STAT3 expression leading to an increase of miR-199a/214 cluster. This strengthens the inhibition of USP7 and BMPR2 and leads to lower level of RUNX2 translated by lower mineralization. The dotted lines are based on prediction softwares, the plain lines are proven interaction through literature or pull-down assay.

Table S1: **Primers used for qPCR.** Primers for miRNAs are designed and purchased by Qiagen

| <b>Primers</b>         | <b>Sequences forward (F) and reverse (R)<br/>5' to 3'</b> |
|------------------------|-----------------------------------------------------------|
| <i>GAPDH</i>           | F: CTGGGCTACACTGAGCACC<br>R: AAGTGGTCGTTGAGGGCAATG        |
| <i>USP7</i>            | F: GGACATGGAGGATGACACCA<br>R: TCACTCAGTCTGCTGAAGCG        |
| <i>STAT3</i>           | F: AGCAGTTTCTTCAGAGCAGGT<br>R: CACAATCCGGGCAATCTCCA       |
| <i>P53</i>             | F: CCCTGCCCTCAACAAGATGT<br>R: CTCCGTCATGTGCTGTGACT        |
| <i>RUNX2</i>           | F: TCAACGATCTGAGATTTGTGGG<br>R: GGGGAGGATTTGTGAAGACGG     |
| <i>Hsa-miR-125b-5p</i> | Qiagen Cat. Number: 339306<br>GeneGlobe ID: YP00205713    |
| <i>Hsa-miR-199a-5p</i> | Qiagen Cat. Number: 339306<br>GeneGlobe ID: YP00204494    |
| <i>Hsa-miR-214-3p</i>  | Qiagen Cat. number: 339306<br>GeneGlobe ID: YP00204510    |
| <i>U6</i>              | Qiagen Cat. number: 339306<br>GeneGlobe ID: YP02119464    |
